# Supplementary material for: Drinking to Cope Mediates the Association between Dyadic Conflict and Drinking Behavior: A Study of Romantic Couples during the COVID-19 Pandemic
Source: MDPI journal article supplement (doi:10.3390/ijerph20146332), 2023-07-10
Supplement: s1 [file s1]

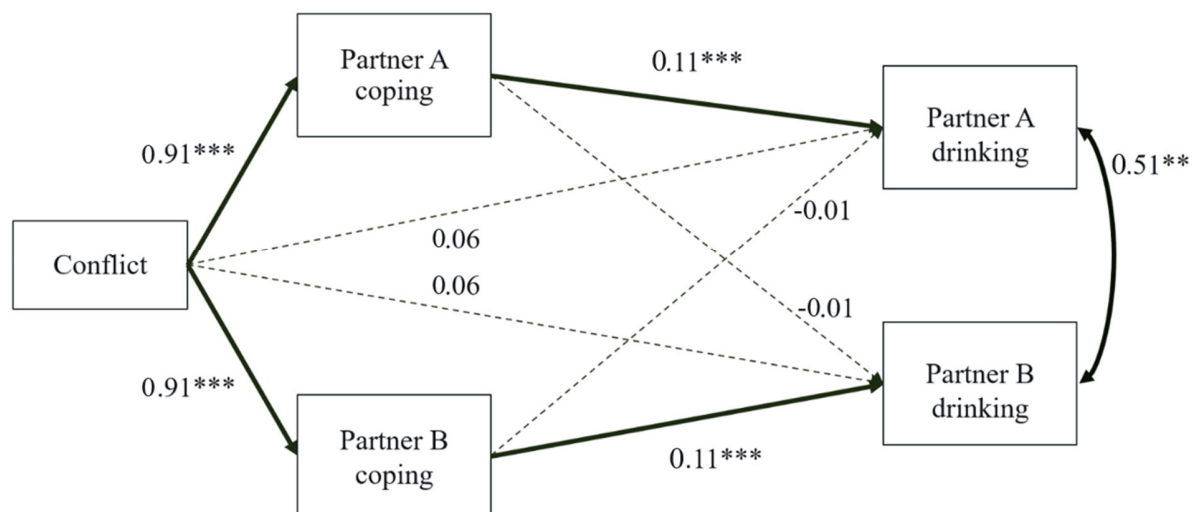

**Figure S1.** Generalized SEM Model with Indistinguishable Dyads controlling for income.

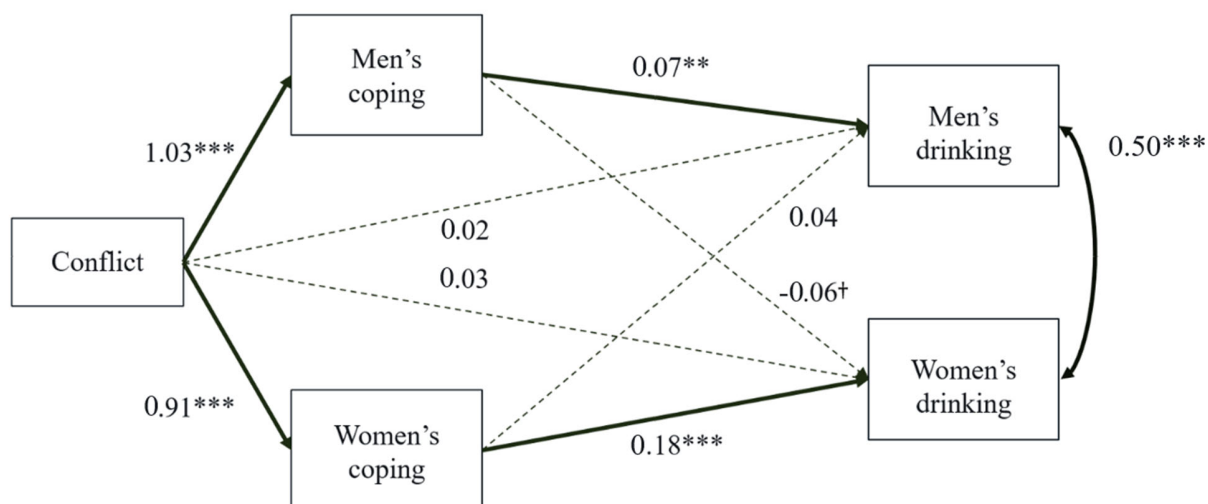

**Figure S2.** Generalized SEM Model with Distinguishable Dyads controlling for income

**Table S1.** Direct and indirect effects of conflict on drinking in indistinguishable dyads controlling for income.

| Effect   | Path                             | <i>b</i> | <i>SE</i> | <i>p</i> | IRR  | LCI  | UCI  |
|----------|----------------------------------|----------|-----------|----------|------|------|------|
| Direct   | Conflict → A Drinking            | 0.06     | 0.03      | 0.063    | 1.06 | 1.00 | 1.13 |
| Indirect | Conflict → A Coping → A Drinking | 0.10     | 0.02      | <0.001   | 1.11 | 1.07 | 1.15 |
| Indirect | Conflict → P Coping → A Drinking | -0.01    | 0.02      | 0.437    | 0.99 | 0.96 | 1.02 |
| Total    | Conflict → A Drinking            | 0.15     | 0.02      | <0.001   | 1.16 | 1.11 | 1.22 |

Note. IRR = Incident Rate Ratio. LCI and HCI are lower and upper 95% confidence intervals from bias-corrected bootstrapping with 1000 resamples. A = actor; P = partner. *n* = 327.

**Table S2.** Direct and indirect effects of conflict on men and women partners' coping and drinking controlling for income.

| <b>Effect</b> | <b>Path</b>                      | <b><i>b</i></b> | <b><i>SE</i></b> | <b><i>p</i></b> | <b>IRR</b> | <b>LCI</b> | <b>UCI</b> |
|---------------|----------------------------------|-----------------|------------------|-----------------|------------|------------|------------|
| Direct        | Conflict → M Drinking            | 0.02            | 0.03             | 0.645           | 1.02       | 0.95       | 1.08       |
| Indirect      | Conflict → M Coping → M Drinking | 0.07            | 0.03             | 0.005           | 1.07       | 1.02       | 1.13       |
| Indirect      | Conflict → W Coping → M Drinking | 0.04            | 0.02             | 0.111           | 1.04       | 0.99       | 1.09       |
| Total         | Conflict → M Drinking            | 0.12            | 0.03             | <0.001          | 1.13       | 1.07       | 1.20       |
| Direct        | Conflict → W Drinking            | 0.03            | 0.04             | 0.542           | 1.03       | 0.94       | 1.12       |
| Indirect      | Conflict → W Coping → W Drinking | 0.16            | 0.03             | <0.001          | 1.17       | 1.11       | 1.26       |
| Indirect      | Conflict → M Coping → W Drinking | -0.06           | 0.03             | 0.048           | 0.94       | 0.89       | 1.00       |
| Total         | Conflict → W Drinking            | 0.13            | 0.03             | <0.001          | 1.14       | 1.07       | 1.21       |

*Note.* IRR = Incident Rate Ratio. LCI and HCI are lower and upper 95% confidence intervals from bias-corrected bootstrapping with 1000 resamples. *n* = 289. M = men; W = women.
